# Supplementary material
Source: PubMed Central journal article supplement (PMC8933164)
Supplement: 43630_2022_202_MOESM1_ESM.pdf [file 43630_2022_202_MOESM1_ESM.pdf]

# Photodynamic disinfection of SARS-CoV-2 clinical samples using a methylene blue formulation

Catarina S. Lobo,<sup>1</sup> Paulo Rodrigues-Santos,<sup>2,3,4</sup> Dina Pereira,<sup>2</sup> Jisette Núñez,<sup>5,2</sup> João C. D. Trêpa,<sup>7</sup> David Lopes Sousa,<sup>7</sup> Jorge Vaz Lourenço,<sup>7</sup> Maria Filomena Coelho,<sup>7</sup> Luis Pereira de Almeida,<sup>5,2,6</sup> José Saraiva da Cunha,<sup>7</sup> Luis G. Arnaut<sup>\*,8</sup>

<sup>1</sup>LaserLeap Technologies, R. Col. Júlio Veiga Simão, CTCV, Ed. B, 3025-307 Coimbra, Portugal

<sup>2</sup>Center for Neuroscience and Cell Biology (CNC), University of Coimbra, 3004-517 Coimbra, Portugal

<sup>3</sup>Institute of Immunology, Faculty of Medicine (FMUC), University of Coimbra, Coimbra, Portugal

<sup>4</sup>Center of Investigation in Environment, Genetics and Oncobiology (CIMAGO), Faculty of Medicine, University of Coimbra, Coimbra, Portugal

<sup>5</sup>Faculty of Pharmacy, University of Coimbra, Coimbra 3000-548, Portugal

<sup>6</sup>ViraVector – Infrastructure of the national roadmap for production of viral vectors for gene transfer

<sup>7</sup>Centro Hospitalar e Universitário de Coimbra, Coimbra, Portugal

<sup>8</sup>CQC, Chemistry Department, University of Coimbra, 3004-535 Coimbra, Portugal

\* [lgarnaut@qui.uc.pt](mailto:lgarnaut@qui.uc.pt) , ORCID: 0000-0002-3223-4819

## Supplementary Figures

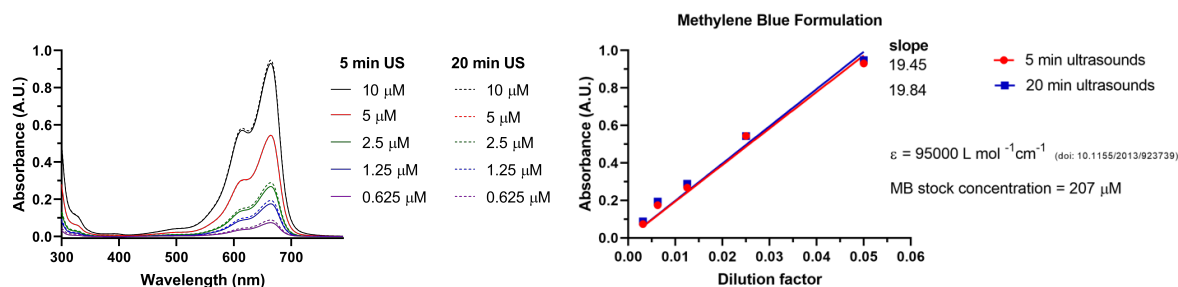

**Figure S1.** Absorption spectra of methylene blue in water prepared by dilution of the Ondine NF-031 formulation, according to the dilution factor in the plot. The freshly prepared solutions were initially exposed to ultrasounds for 5 min and then for additional 20 min, to ensure that dimer-monomer equilibrium is properly established.

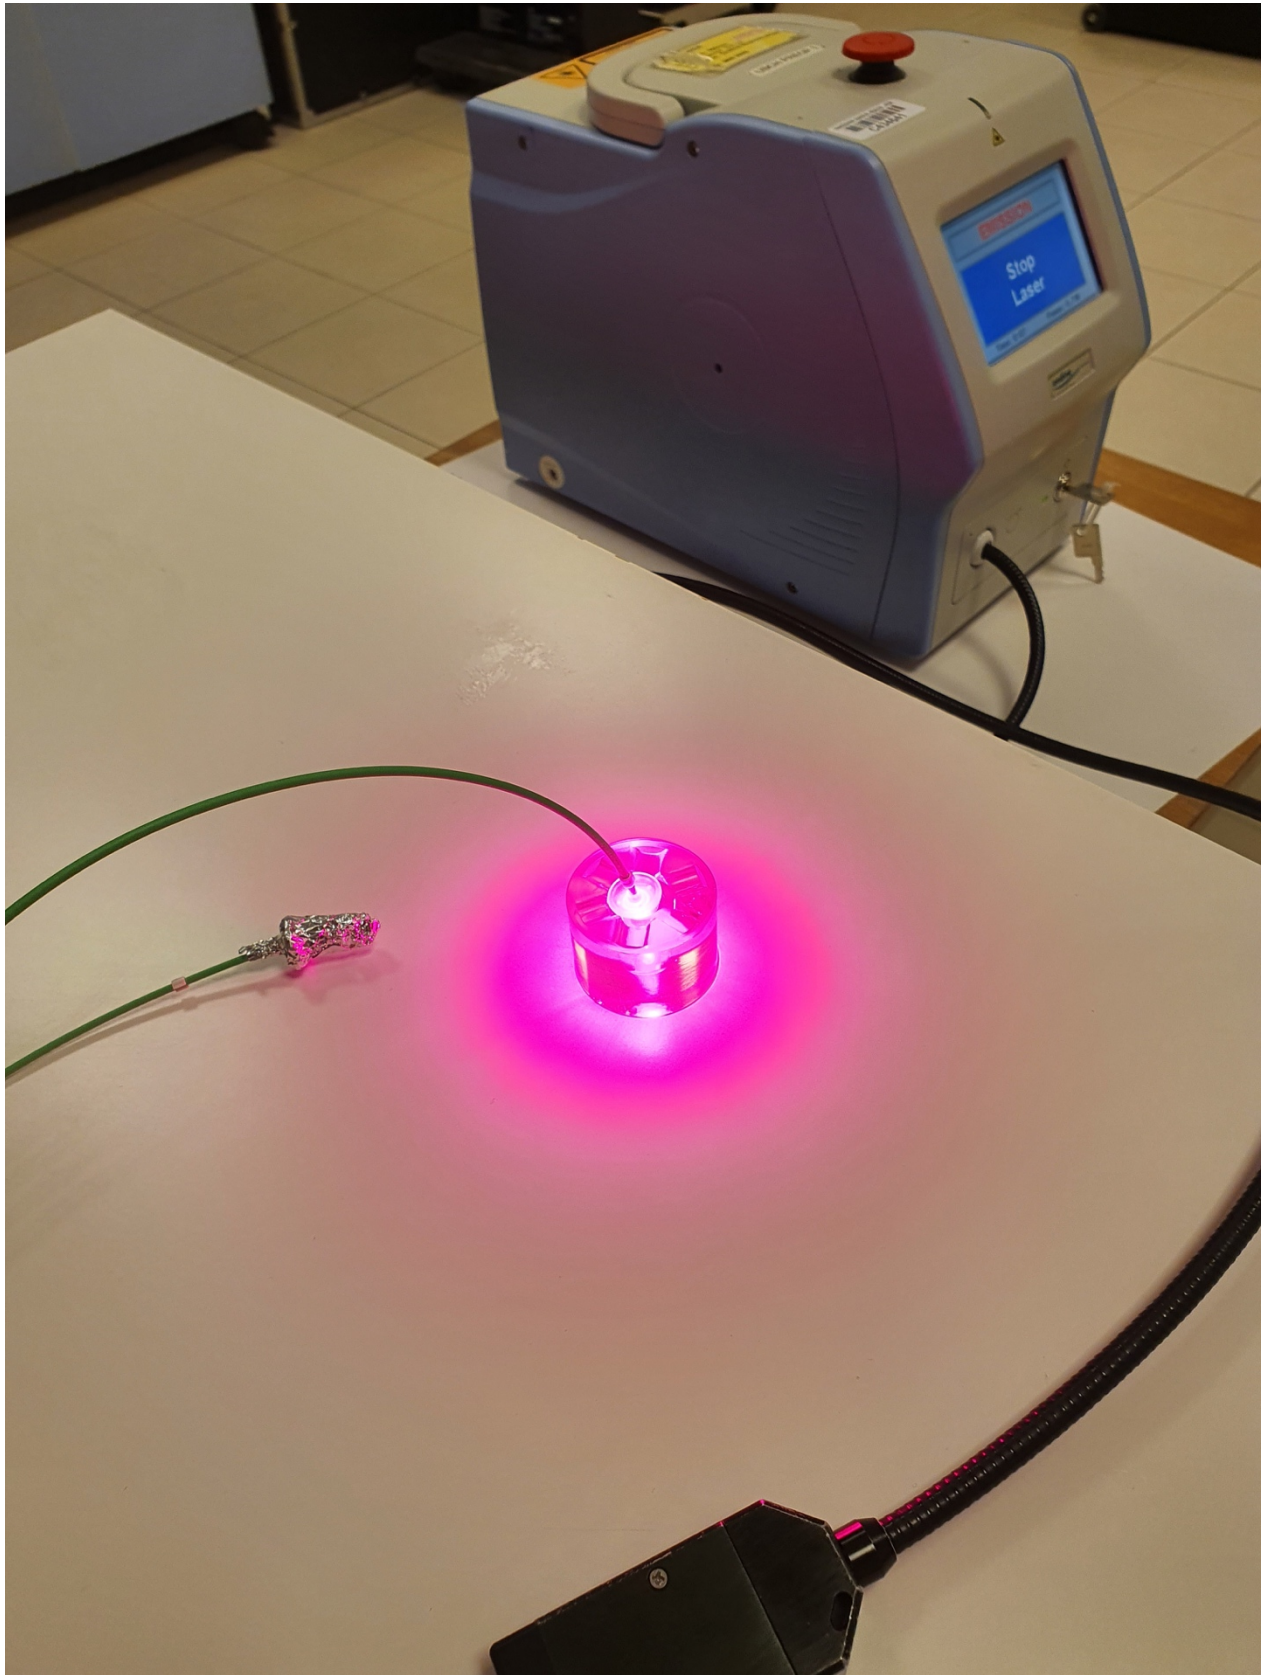

**Figure S2.** Nasal Light Illuminator Assembly (MRSAid/Steriwave Photodisinfection System) and container employed in the photodisinfection of clinical samples.

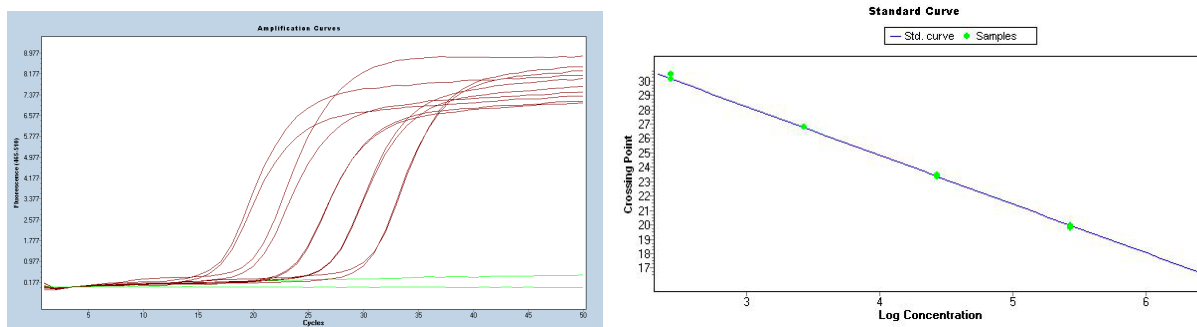

**Figure S3.** Typical RT-qPCR calibration curve used to determine the efficiency, linear range, and reproducibility of a qPCR assay.

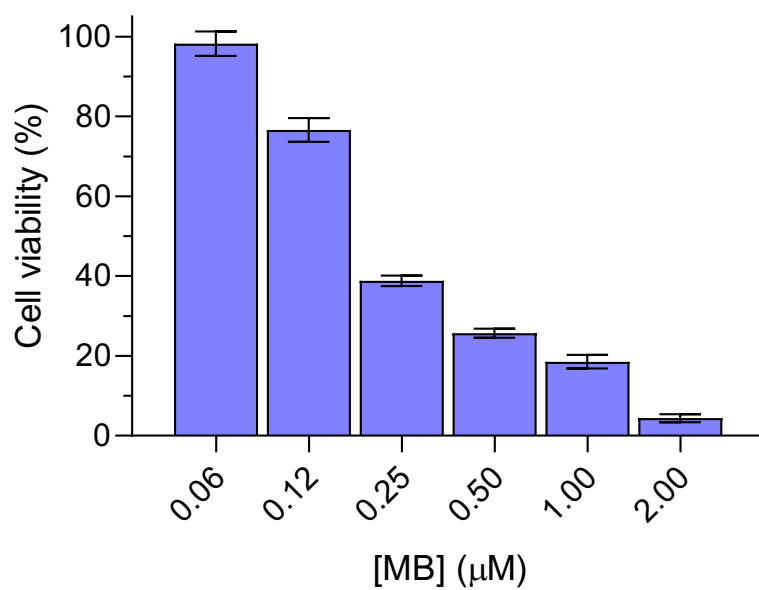

**Figure S4.** HEK-293T-hACE2 cells viability after 24 h of incubation with different MB concentrations in the dark. ( $\text{IC}_{50} = 0.26 \mu\text{M}$ )
